## Food Insecurity amid COVID-19 Lockdowns: Assessing Sociodemographic Indicators of Vulnerability in Harar and Kersa, Ethiopia

Jonathan A. Muir<sup>1†</sup>, Merga Dheresa<sup>2†</sup>, Zachary J. Madewell<sup>3</sup>, Tamirat Getachew<sup>2</sup>, Gezahegn Mengesha<sup>2</sup>, Cynthia G. Whitney<sup>1</sup>, Nega Assefa<sup>2‡</sup>, and Solveig A. Cunningham<sup>1‡</sup>

†Co-first authors

‡Co-senior authors

### Affiliations

1. Emory University, Atlanta, GA, United States
2. Haramaya University, Harar, Ethiopia
3. Center for Global Health, Centers for Disease Control and Prevention, Atlanta, GA, United States

**Corresponding author:** Jonathan A. Muir, Emory University, Atlanta, GA, United States, [jamuir@emory.edu](mailto:jamuir@emory.edu)

**Short title:** Food Insecurity amid COVID-19 Lockdowns in Ethiopia

### ABSTRACT

**Objective** The COVID-19 pandemic was associated with widespread social disruptions, as governments implemented lockdowns to quell disease spread. To advance knowledge of consequences for households in lower-income countries, we examine food insecurity during the pandemic period. **Design** Cross-sectional study using logistic regression to examine factors associated with food insecurity. Data were collected between August and September of 2021 through a Health and Demographic Surveillance System (HDSS) using a survey instrument focused on knowledge regarding the spread of COVID-19; food availability; COVID-19 related shocks/coping; under-five child healthcare services; and healthcare services for pregnant women. **Setting** The study is set in two communities in Eastern Ethiopia, one rural and one urban. **Participants** A random sample of 880 households residing in Kersa and Harar. **Results** Roughly 16% of households reported not having enough food to eat during the pandemic, an increase of 6% since before the pandemic. After adjusting for other variables, households were more likely to report food insecurity if they were living in an urban area, were a larger household, had a family member lose employment, reported an increase in food prices, or were food insecure before the pandemic. Households were less likely to report food insecurity if they were wealthier or had higher household income. **Discussion** After taking other characteristics into consideration, households in urban areas were at higher risk for food insecurity. These findings point to the need for expanding food assistance programs to more urban areas to help mitigate the impact of lockdowns on more vulnerable households.

1    **INTRODUCTION**

2    COVID-19 was associated with one of the largest disruptions to life in the 21<sup>st</sup> century. Beyond  
3    immediate health effects,<sup>(1)</sup> the pandemic also had social and economic implications as government-  
4    enforced lockdowns were implemented with the goal of mitigating the pace and severity of the  
5    disease.<sup>(2)</sup> To comply with these lockdowns, many businesses had to close in-person offices or  
6    shops; for some, this meant closing permanently. Healthcare providers also had to restrict in-person  
7    access to patients and/or decrease their services. These lockdowns are also thought to have affected  
8    the health of children by limiting families’ ability to access food—especially in isolated regions of  
9    resource-limited countries.<sup>(3-13)</sup> Information on the extent to which households living in non-western  
10   countries have experienced resource restrictions and other hardships remains limited due to  
11   incomplete or nonexistent population health surveillance.<sup>(14)</sup> We utilized data from an existing Health  
12   and Demographic Surveillance System (HDSS) with catchment areas situated in an urban area of the  
13   Harari People’s National Regional State and a rural area within the district of Kersa in Eastern  
14   Ethiopia. We employed a social vulnerabilities framework<sup>(15,16)</sup> that considered both social inequalities  
15   and place inequalities as components of vulnerability to analyze food insecurity in the context of the  
16   pandemic.

17

18    **BACKGROUND**

19    Food security is the condition in which “all people, at all times, have physical, social, and economic  
20    access to sufficient, safe, and nutritious food that meets their dietary needs and food preferences for  
21    an active and healthy life.”<sup>(17)</sup> It has been described across four dimensions: food availability, food  
22    accessibility, food utilization and food stability.<sup>(6)</sup> It is anticipated that households around the world,  
23    especially in resource-limited countries, have experienced increases in food *insecurity* due to the  
24    social and economic repercussions of COVID-19.<sup>(3-13)</sup> Pathways through which lockdowns may  
25    exacerbate food insecurities include movement restrictions, food supply chain disruptions,  
26    disruptions to informal markets, food price increases, reductions in individual or household income  
27    due to job loss or business closure, and loss of access to government food programs.<sup>(7)</sup> Although  
28    mortality directly related to COVID-19 is lower among children and pregnant women compared to  
29    older adults, reductions in access to basic nutrition, coupled with disruptions in access to  
30    preventative maternal and child healthcare, may increase mortality and morbidity among young  
31    children and pregnant women.<sup>(4, 18-22)</sup> Particular concern has been raised regarding health  
32    consequences of pandemic-related lockdowns in sub-Saharan Africa.<sup>(8)</sup>

33

## 34 **COVID-19 Lockdowns in Sub-Saharan Africa and Ethiopia**

35 In sub-Saharan Africa, national governments have taken substantial efforts to quell the spread of  
36 COVID-19.<sup>(2, 23)</sup> Implementation of physical distancing, sanitary measures, and encouragement of  
37 personal responsibility have been used to help slow the spread of disease. In particular, communities  
38 have been tasked with monitoring self-isolation measures, physical distancing, and quarantining. A  
39 notable challenge that many sub-Saharan Africa countries have likely faced during pandemic-related  
40 lockdowns is food insecurity.<sup>(3-9)</sup> Many countries in Sub-Saharan Africa rely on food imports,  
41 particularly in urban areas; lockdowns and related border closures may compromise these food  
42 supply chains, leading to food shortages and price increases.<sup>(8)</sup> Coupled with on-going climate  
43 change, pests, and emerging crop diseases, it is anticipated that there will be many who are indirectly  
44 hurt by the pandemic in addition to those directly affected by COVID-19. This is likely the case  
45 Ethiopia, where the government responded with stringent measures to mitigate the pace and severity  
46 of COVID-19.<sup>(24)</sup>

47  
48 Mitigation efforts in Ethiopia included establishing lockdowns, enforcing social distancing, and  
49 placing emphasis on hygiene protocols; these efforts were initially adopted on March 16<sup>th</sup> of 2020,  
50 tightened on March 20<sup>th</sup>, and a five-month state of emergency was declared on April 10<sup>th</sup>.<sup>(24)</sup> Yet,  
51 social and economic disparities across different sociodemographic groups and geospatial  
52 inequalities may have resulted in uneven implementation of these efforts.<sup>(11)</sup> Populations in urban  
53 centers may have been better equipped to receive information about these directives compared to  
54 rural populations that face communication barriers.<sup>(25)</sup> Rural populations likely confronted challenges  
55 with implementing some measures due to limited access to handwashing facilities or lack spare  
56 rooms in their dwellings for social distancing or quarantine; however lower population density may  
57 have aided in social distancing between households.<sup>(25)</sup> Social and economic disparities may also  
58 have resulted in differential vulnerability to adverse consequences of mitigation efforts.

## 59 60 **Vulnerability to Food Insecurity in Ethiopia**

61 Vulnerability, broadly defined, is the cumulative effect of cultural, economic, institutional, political,  
62 and social processes that modify socioeconomic differences in the experience of and recovery from  
63 hazards.<sup>(15, 26)</sup> In the context of disasters, it is often not the hazard itself that creates the disaster;  
64 rather, the disaster is the impact on individual and community coping patterns and the inputs and  
65 outputs of social systems.<sup>(27-29)</sup> Social vulnerability is partially the result of social disparities that shape  
66 or influence the susceptibility of different groups to hazards while also controlling their capacity to  
67 respond.<sup>(15, 16)</sup> Factors often associated with vulnerability include demographic characteristics such

68 as age, ethnicity, race, and sex; socioeconomic status (e.g., income, wealth, employment, and/or  
69 education); household composition (e.g., presence of children or elderly); and housing and  
70 transportation.<sup>(30)</sup> However, social vulnerability also involves place disparities stemming from  
71 characteristics of communities and the built environment that contribute to the vulnerability of place.  
72 For example, differential availability of scarce resources between urban and rural areas may  
73 exacerbate social vulnerabilities to hazards.<sup>(16, 31, 32)</sup> To understand the broader consequences of the  
74 pandemic, it is important to consider economic, political, and social markers of vulnerability at both  
75 the individual and community level.<sup>(23)</sup>

76  
77 In Ethiopia, food insecurity was prevalent prior to the onset of the pandemic with those already  
78 burdened by poverty at greater risk for experiencing food insecurity; it is anticipated that COVID-19  
79 has exacerbated this vulnerability.<sup>(7, 11)</sup> Households hit with an economic shock such as a job loss or  
80 loss of income during the pandemic are likely at high risk for experiencing food insecurity, as they  
81 must reduce expenditures to adapt to the economic shock.<sup>(9, 33)</sup> Disadvantaged groups such as  
82 women and children, people working in the informal sector or unemployed, those with limited financial  
83 resources, those with medical conditions, and those relying on emergency food aid are also at high  
84 risk.<sup>(23, 34)</sup> Rural populations in Ethiopia are at elevated risk for food insecurity as climate change,  
85 severe drought, conflict, and environmental degradation have culminated in societal shocks affecting  
86 livelihoods, particularly for farmers.<sup>(16, 35, 36)</sup> However, understanding geospatial differences in  
87 vulnerability is complicated because international and national food programs were established to  
88 provide food aid to needy populations, especially in rural areas, prior to the onset of the pandemic.<sup>(37)</sup>  
89 Given their strong emphasis on addressing food insecurity in rural areas, these programs may not  
90 reach food insecure households living in urban areas.<sup>(37, 38)</sup> Differential vulnerability requires targeted,  
91 context specific interventions to address ancillary consequences of the pandemic such as increases  
92 in food insecurity.<sup>(39)</sup> To help inform such interventions and increase their precision and efficacy, we  
93 analyze demographic, economic, and social factors associated with food insecurity during the  
94 pandemic.

## 95 96 **METHODS**

### 97 **Study setting**

98 The setting for this study is a predominantly rural area in the district of Kersa and an urban area in  
99 the Harari People's National Regional State in Eastern Ethiopia.<sup>(40, 41)</sup> The rural area consists of 24  
100 kebeles (a neighborhood or ward representing the lowest level of local government), and covers 353  
101 km<sup>2</sup> with a population of 135,754 in 25,653 households. The urban area consists of 12 kebeles, a

102 population of 55,773 in 14,768 households, across 25.4 km<sup>2</sup>.<sup>(41)</sup> The population has been followed  
103 through a Health and Demographic Surveillance System since 2012, with demographic and health-  
104 related information regularly collected (see Figure 1).  
105

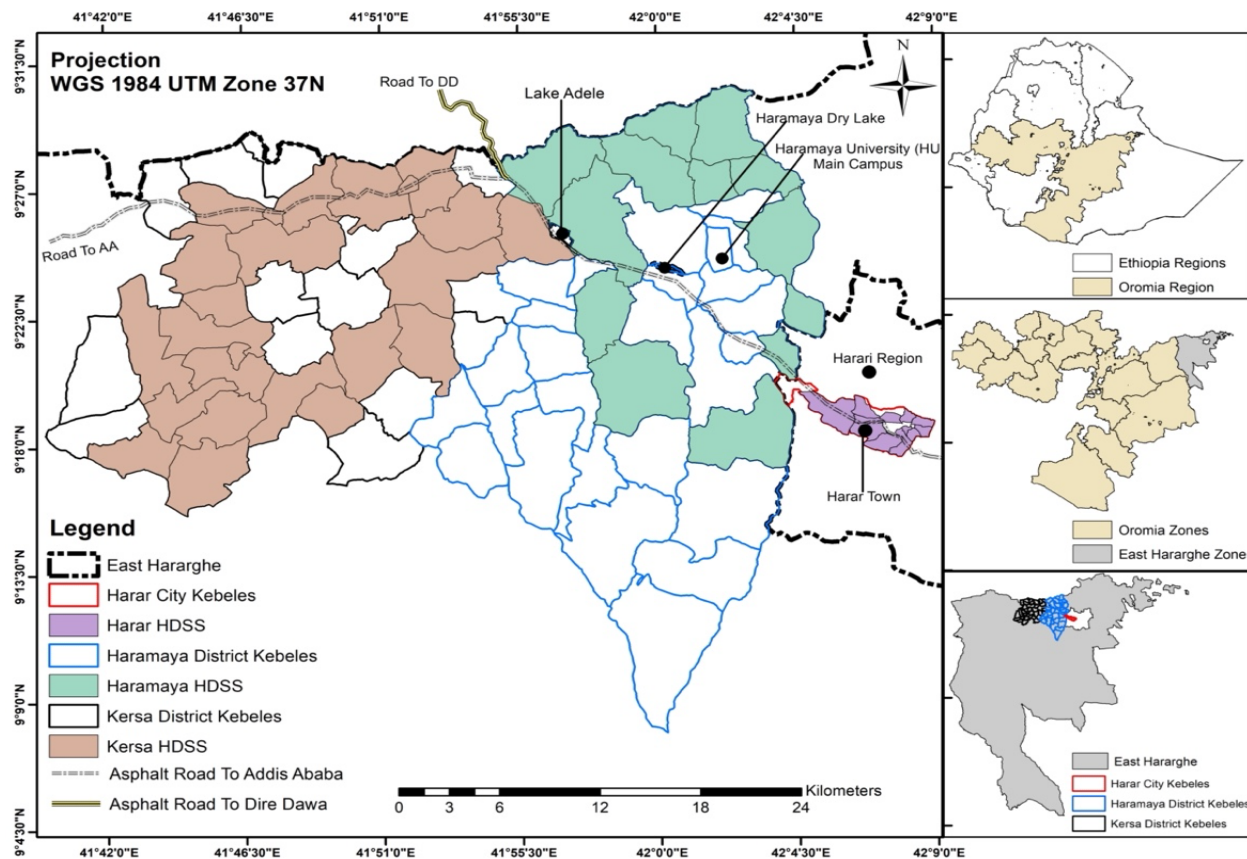

**Figure 1. The Harar and Kersa Health and Demographic Surveillance Systems (HDSS) within East Hararghe, Oromia, Ethiopia.** The smaller map panels on the right identify the location of the HDSS catchment areas within the East Hararghe Zone of the Oromia region in Ethiopia. The HDSS catchment in Haramaya (depicted in green) was in development during the data collection period, so households from this catchment were not included in this study.

## 112 Study design

113 This study is part of a broader investigation within the Child Health and Mortality Prevention  
114 Surveillance (CHAMPS) network to understand the implications of COVID-19 lockdowns for child  
115 health and mortality<sup>(33, 42)</sup>. We developed and administered a short quantitative instrument designed  
116 to understand how the pandemic and related lockdowns may have affected livelihood, food  
117 availability, and healthcare. Households were selected using simple random sampling. The sample  
118 size was set to 440 each from the rural (Kersa) and urban (Harar) catchment areas (total sample size  
119 of 880 households). The sample size was specified to detect prevalence of changes in accessing

120 care. A priori specifications were 50% of the population experiencing changes, 95% CI, precision of  
121 0.05 and non-response adjustment of 10%.

122

123 The data collection instrument was organized into five sections: knowledge regarding the spread of  
124 COVID-19; food availability; COVID-19 related shocks/coping; under-five child healthcare services;  
125 and healthcare services for pregnant women. Questions in the survey instrument related to hardships  
126 associated with the pandemic period asked respondents to consider whether they had experienced  
127 hardships since March of 2020. Data were collected by HDSS enumerators in August and September  
128 2021 through tablet-based in-person interviews with heads of households or their spouse.  
129 Households' responses were linked with their data from the most recent HDSS round, which had  
130 occurred in 2021, to incorporate information on age, sex, occupation, and education of the head of  
131 household; the number of children under 5 years of age and the number of elderly adults (over 60  
132 years) in the household; and household assets and residence construction materials.

133

134 Data quality assurance and cleaning followed standard operating procedures for the HDSS<sup>(40, 43)</sup>.  
135 Inconsistent or missing data were flagged for data collectors to correct. Field supervisors and the  
136 field coordinator selected a random sample of questionnaires for re-visits to verify the recorded  
137 information. Implementation of the module was approved by the Institutional Health Research Ethics  
138 Review Committee (IHRERC); approval reference number Ref.No.IHRERC/127/2021.

139

#### 140 **Measures**

141 The variable of interest is *food insecurity*, indicating that a household reported not having enough  
142 food to eat at any point since March 2020 based on responses to the question: “*Since the beginning*  
143 *of the COVID lockdown, has it happened that your household did not have enough food to eat?*” The  
144 variable is coded as 0 = no, 1 = yes. Additional variables identified the reasons that a household was  
145 unable to get enough food, with respondents able to report multiple reasons: *couldn't afford to buy*  
146 *more food; couldn't go out to buy food, afraid to go out to buy food; couldn't get groceries or meals*  
147 *delivered; and stores did not have the food I wanted.*

148

149 Right-hand side variables were information on the head of household and characteristics of the  
150 household and its homestead. Head of household variables were *age* (coded as 1 = less than 40  
151 years, 2 = 41 to 44 years, 3 = 45 to 60 years, and 4 = sixty years and above); *sex* (coded as male = 0  
152 and female = 1); *ethnicity* (coded as Amhara = 1 (reference) and other = 2, which included Oromo,  
153 Somali, Gurage, Harari and Tigray); *education* (coded as no formal education = 0 (reference), any

154 level of education = 1); *occupation* (coded as 1 = farmer (reference), 2 = student, 3 = professional, 4  
155 = sales, 5 = housewife, 6 = daily laborer, 7 = other employment, 8 = unemployed/retired). Household  
156 variables were *urbanicity* (coded as urban (Harar) = 1 and rural (Kersa) = 0); *household size* (coded as  
157 1 = 1-2 individuals (reference), 2 = 3-4 individuals, 3 = 5-6 individuals, 4 = 7-8 individuals, 5 = 9+  
158 individuals); *children under 5* (coded as 0 = no, 1 = yes); *adults over age 60* (coded as 0 = no, 1 =  
159 yes); monthly *income* (coded into quartiles as 1 = 0-1,200 Birr Ethiopia Birr (reference), 2 = 1,201-  
160 2,000 Birr, 3 = 2,001-3,000 Birr, 4 = 3,001-4,600 Birr, and 5 = 4,600+)<sup>1</sup>; *wealth index* based on a list  
161 of household assets (coded as an 1 = poorest (reference), 2 = poorer, 3 = middle, 4 = richer, 5 =  
162 richest)<sup>2</sup>; *job loss* by any household member since March of 2020 (coded as 0 = no, 1 = yes); *food*  
163 *price increase* noticed by the household after March of 2020 (coded as 0 = no, 1 = yes); and *pre-*  
164 *COVID food insecurity* (coded as 0 = no, 1 = yes)<sup>3</sup>.

165

### 166 **Analytic Strategy**

167 Data cleaning and analyses were performed using R version 4.2.0.<sup>(44)</sup> Education and occupation  
168 related data were missing for nine household heads and observations for these households were  
169 removed from analyses that included these variables. Data on pre-pandemic food insecurity was  
170 missing for one household. There were no other missing values for the variables used.

171

172 Descriptive statistics were generated to assess the prevalence of food insecurity and other hardships  
173 and sociodemographic characteristics. Pearson's Chi-square tests were used for preliminary  
174 evaluation of associations between household characteristics and food insecurity. Unadjusted  
175 logistic regression models were used to analyze associations with food insecurity (results available  
176 upon request). Adjusted logistic regression was then used to control for other characteristics.

177

178 Several pathway-specific models were examined prior to fitting the final model and are available upon  
179 request. The variables described above were selected for inclusion in the final adjusted logistic  
180 regression because there was theoretical justification for association with food insecurity. We  
181 assessed model fit with comparison of AIC and BIC scores—both scores were the smallest for the  
182 fully adjusted model, indicating that this model had superior fit compared to simpler or pathway-

---

<sup>1</sup> Based on exchange rates at the time of the survey, this is roughly equivalent to 1 = 88+ USD (reference), 2 = 55 to 87 USD, 3 = 30 to 54 USD, and 4 = Less than 30 USD.

<sup>2</sup> For information on the principal components analysis used to compute the index, see Supplemental Materials.

<sup>3</sup> Based on responses to the question: “Before mid-March 2020, did it ever happen that your household did not have enough food to eat?” from the CHAMPS Ethiopia Lockdown Module.

183 specific models. Results are reported as Adjusted Odds Ratios (AOR) with 95% confidence intervals  
184 (95% CI) and visualized with forest plots.<sup>(45, 46)</sup> Given anticipated differences in demographic,  
185 economic, and social characteristics between households living in urban vs. rural areas, effect  
186 modification was evaluated using interaction terms; however, the results of these analyses were not  
187 statistically significant so they were not retained. Finally, a secondary analysis was conducted  
188 wherein only those respondents who reported that their household had no difficulty obtaining  
189 sufficient food prior to March of 2020 were included. This analysis examined factors associated with  
190 the change from food secure prior to COVID-19 to food insecure during the pandemic. For this  
191 analysis, some variables from the primary analysis such as ethnicity could not be included due to  
192 lack of variation; other variables required recoding to due to sample size limitations.

193

## 194 **RESULTS**

195 A majority of households (63.3%) were headed by a male household member (Table 1). Average age  
196 of the household head was 43 years with a standard deviation of 15. Oromo and Amhara were the  
197 most common ethnicities, with 551 (62.6%) household heads identifying as Oromo and 222 (25.2%)  
198 as Amhara. A majority (57.9%) of household heads had obtained at least some education; their most  
199 common occupations were farmer (36.4%) and professional (18.3%). The majority of households  
200 resided in urban areas (62.8%). The median number of household members was 5 with a standard  
201 deviation of 2.4. Roughly a third of households reported having at least one child under the age of 5.  
202 About a quarter of households had at least one adult family member over the age of 60. About 10%  
203 of households reported that they were unable to obtain sufficient food prior to the onset of the  
204 pandemic; a majority of these households (94%) continued to report food insecurity during the  
205 pandemic.

206

207 Since the onset of the pandemic, 15.7% of households reported not having enough food to eat, an  
208 increase of 5.8% from pre-pandemic levels; 59.5% of households reported an increase in food prices;  
209 and 55.5% of households reported having at least one family member lose a job during this period.  
210 Of the reasons reported by respondents for their household not being able to obtain sufficient food,  
211 roughly 88% reported that they couldn't afford to buy more food, approximately 41% reported that  
212 they couldn't get out to buy food, 23% of respondents reported fearing to go out and buy food, 20%  
213 of respondents reported that they couldn't have groceries delivered, and 17% of respondents  
214 reported that stores didn't have the food they wanted.



215 **Table 1: Descriptive Statistics and Chi-Square Values for HDSS Households**

|                                          |                         | Household Food Insecurity |       |       |       | $\chi^2$ | p-value |       |        |
|------------------------------------------|-------------------------|---------------------------|-------|-------|-------|----------|---------|-------|--------|
|                                          |                         | Total                     | %     | No    | %     |          |         | Yes   | %      |
|                                          |                         | n=880                     |       | n=742 | 84%   |          |         | n=138 | 16%    |
| <b>Head of Household Characteristics</b> |                         |                           |       |       |       |          |         |       |        |
| Age                                      | <40                     | 218                       | 25%   | 190   | 26%   | 28       | 20%     | 3.5   | 0.324  |
|                                          | 41-50                   | 265                       | 30%   | 224   | 30%   | 41       | 29%     |       |        |
|                                          | 51-60                   | 179                       | 20%   | 149   | 20%   | 30       | 21%     |       |        |
|                                          | 60+                     | 218                       | 25%   | 176   | 24%   | 42       | 30%     |       |        |
| Sex                                      | Female                  | 303                       | 34%   | 257   | 35%   | 46       | 33%     | 0.2   | 0.622  |
|                                          | Male                    | 577                       | 66%   | 482   | 65%   | 95       | 67%     |       |        |
| Ethnicity                                | Amhara                  | 222                       | 25%   | 210   | 28%   | 12       | 9%      | 23.8  | <0.001 |
|                                          | Other                   | 658                       | 75%   | 529   | 72%   | 129      | 91%     |       |        |
| Education                                | No Formal Education     | 361                       | 41%   | 278   | 38%   | 83       | 59%     | 21.9  | <0.001 |
|                                          | Some Level of Education | 510                       | 58%   | 453   | 62%   | 57       | 40%     |       |        |
| Occupation                               | Farmer                  | 320                       | 36%   | 250   | 34%   | 70       | 50%     | 25.7  | <0.001 |
|                                          | Student                 | 59                        | 7%    | 55    | 7%    | 4        | 3%      |       |        |
|                                          | Professional            | 161                       | 18%   | 152   | 21%   | 9        | 6%      |       |        |
|                                          | Sales                   | 75                        | 9%    | 63    | 9%    | 12       | 9%      |       |        |
|                                          | Housewife               | 81                        | 9%    | 67    | 9%    | 14       | 10%     |       |        |
|                                          | Day Laborer             | 67                        | 8%    | 54    | 7%    | 13       | 9%      |       |        |
|                                          | Other work              | 21                        | 2%    | 18    | 2%    | 3        | 2%      |       |        |
|                                          | Unemployed/Retired      | 87                        | 10%   | 72    | 10%   | 15       | 11%     |       |        |
| <b>Household Level Characteristics</b>   |                         |                           |       |       |       |          |         |       |        |
| Urbanicity                               | Kersa (Rural)           | 440                       | 50.0% | 361   | 48.8% | 79       | 56.0%   | 2.4   | 0.118  |
|                                          | Harar (Urban)           | 440                       | 50.0% | 378   | 51.2% | 62       | 44.0%   |       |        |
| Household Size                           | 1-2                     | 146                       | 16.6% | 127   | 17.2% | 19       | 13.5%   | 9.5   | 0.050  |
|                                          | 3-4                     | 257                       | 29.2% | 219   | 29.6% | 38       | 27.0%   |       |        |
|                                          | 5-6                     | 247                       | 28.1% | 215   | 29.1% | 32       | 22.7%   |       |        |
|                                          | 7-8                     | 171                       | 19.4% | 138   | 18.7% | 33       | 23.4%   |       |        |
|                                          | 9+                      | 59                        | 6.7%  | 43    | 5.8%  | 16       | 11.3%   |       |        |
| Children Under Age 5                     | No                      | 578                       | 65.7% | 496   | 67.1% | 82       | 58.2%   | 4.2   | 0.040  |
|                                          | Yes                     | 302                       | 34.3% | 243   | 32.9% | 59       | 41.8%   |       |        |
| Adults Over Age 60                       | No                      | 644                       | 73.2% | 552   | 74.7% | 92       | 65.2%   | 5.4   | 0.020  |
|                                          | Yes                     | 236                       | 26.8% | 187   | 25.3% | 49       | 34.8%   |       |        |
| Income (Birr)                            | 4,600+                  | 174                       | 19.8% | 164   | 22.2% | 10       | 7.1%    | 25.6  | <0.001 |
|                                          | 3,001 - 4,600           | 134                       | 15.2% | 119   | 16.1% | 15       | 10.6%   |       |        |
|                                          | 2,001 - 3,000           | 168                       | 19.1% | 139   | 18.8% | 29       | 20.6%   |       |        |
|                                          | 1,201 - 2,000           | 210                       | 23.9% | 166   | 22.5% | 44       | 31.2%   |       |        |
|                                          | 0 - 1,200               | 193                       | 21.9% | 150   | 20.3% | 43       | 30.5%   |       |        |
| Wealth Index                             | Richest                 | 179                       | 20.3% | 175   | 23.7% | 4        | 2.8%    | 44.5  | <0.001 |
|                                          | Richer                  | 173                       | 19.7% | 153   | 20.7% | 20       | 14.2%   |       |        |
|                                          | Middle                  | 180                       | 20.5% | 144   | 19.5% | 36       | 25.5%   |       |        |
|                                          | Poorer                  | 173                       | 19.7% | 136   | 18.4% | 37       | 26.2%   |       |        |
|                                          | Poorest                 | 175                       | 19.9% | 131   | 17.7% | 44       | 31.2%   |       |        |
| Job Loss                                 | No                      | 392                       | 44.5% | 347   | 47.0% | 45       | 31.9%   | 10.2  | <0.001 |
|                                          | Yes                     | 488                       | 55.5% | 392   | 53.0% | 96       | 68.1%   |       |        |
| Food Price Increase                      | No                      | 356                       | 40.5% | 326   | 44.1% | 30       | 21.3%   | 25.6  | <0.001 |
|                                          | Yes                     | 524                       | 59.5% | 413   | 55.9% | 111      | 78.7%   |       |        |
| Pre-Covid Food Insecurity                | No                      | 792                       | 90.0% | 733   | 99.2% | 59       | 41.8%   | 438.6 | <0.001 |
|                                          | Yes                     | 87                        | 9.9%  | 5     | 0.7%  | 82       | 58.2%   |       |        |

n= 880.

Data source: CHAMPS Ethiopia Lockdown Module data and CHAMPS Ethiopia Health and Demographic Surveillance data.

Notes: Nine observations were missing for head of household's education and occupation. One observation was missing for whether a household had experienced food insecurity prior to the onset of COVID-19. The "other" category for ethnicity included: Oromo, Somali, Gurage, Harari, Tigray, and "other". One observation was missing for whether a household had experienced food insecurity prior to the onset of COVID-19.

216  
217  
218  
219  
220  
221  
222

223 After adjusting for other characteristics (see Figure 2), households were more likely to report food  
224 insecurity if the household head identified as an ethnic group other than the Amhara (AOR = 3.28,  
225 95% CI [1.08, 12.05]) or if their residence was located in an urban compared to a rural area (AOR =  
226 2.62, 95% CI [1.10, 6.46]). Compared to households with 1 to 2 household members, larger  
227 households were more likely to have reported food insecurity; for example, for households with 7-8  
228 members, the adjusted odds of reporting food insecurity were 5.42 times higher (95% CI [1.32,  
229 23.35]). Compared to households with less than 1,200 Birr of monthly income, households with higher  
230 income were less likely to report food insecurity; for example, AOR = 0.18 (95% CI [0.05, 0.57]) for  
231 households with more than 4,600 Birr per month. Households in the wealthiest quintile were less  
232 likely to report food insecurity compared to the poorest households, AOR = 0.18, 95% CI [0.05, 0.57]).  
233 Households that observed increases in food prices were more likely to experience food insecurity  
234 (AOR = 2.20, 95% CI [1.11, 4.53]). Finally, after adjusting for other characteristics, households that  
235 reported food insecurity prior to the pandemic were more likely to report food insecurity during the  
236 pandemic (AOR = 423.03, 95% CI [139.44, 1685.07]). Interaction terms for evaluating effect  
237 modification between urban vs. rural residence and other characteristics were only statistically  
238 significant for job loss during the pandemic—urban households that had had a job loss were most  
239 likely to report insufficient food. All other associations were similar for urban and rural households.

240  
241 In the secondary analysis that examined only those households that had indicated that they were  
242 food secure prior to the onset of the pandemic (see Figure 3), larger households were more likely to  
243 have reported food insecurity; for example, for households with 7-8 members, the adjusted odds of  
244 reporting food insecurity were 5.03 times higher (95% CI [1.47, 20.96]). Compared to households  
245 with less than 1,200 Birr of monthly income, households with higher income were less likely to report  
246 food insecurity; for example, AOR = 0.15 (95% CI [0.03, 0.56]) for households with more than 4,600  
247 Birr per month. Richer households were less likely to report food insecurity compared to the poorest  
248 households, AOR = 0.16, 95% CI [0.05, 0.42]). Households that observed increases in food prices  
249 were more likely to experience food insecurity (AOR = 2.88, 95% CI [1.41, 6.27]). Ethnicity was  
250 dropped from the model due to lack of variation—only those households with a household head other  
251 than the Amhara became food insecure during the pandemic. Similarly, no households from the  
252 richest wealth quintile became food insecure during the pandemic.

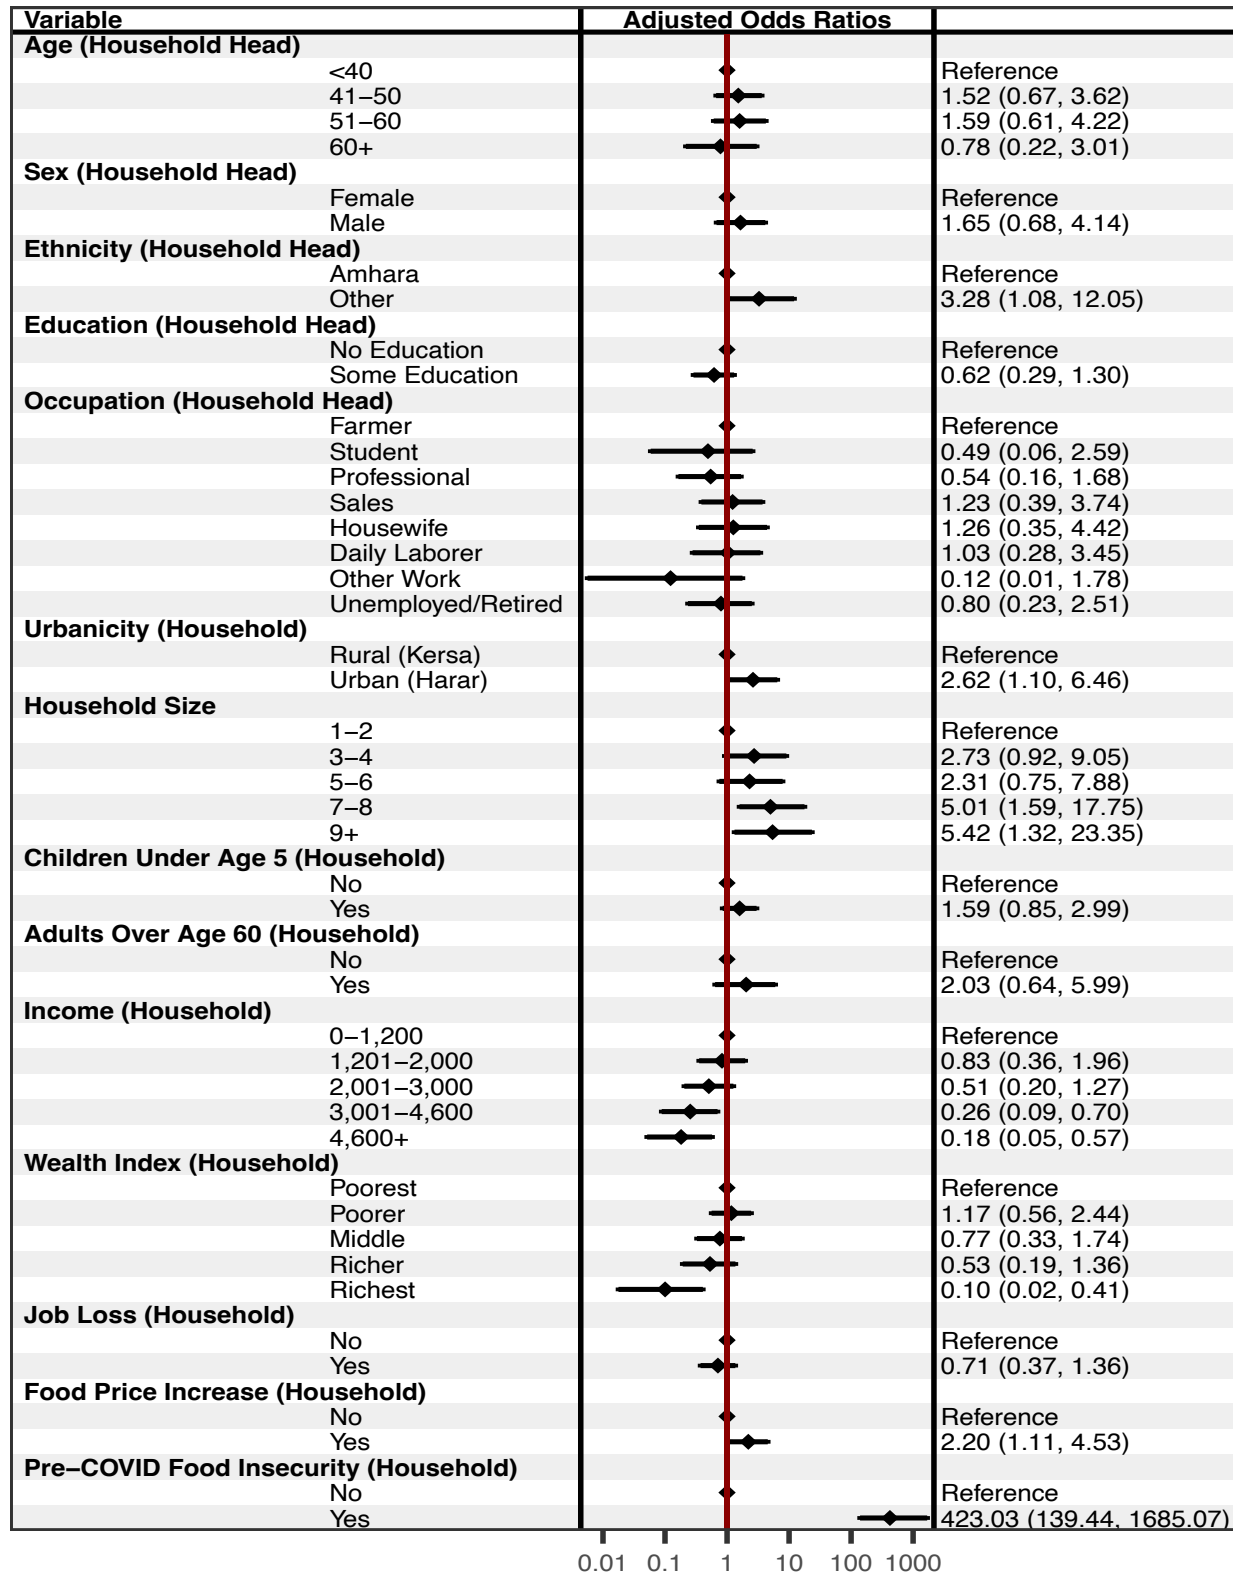

253  
254  
255  
256

**Figure 2. Adjusted Associations with Food Insecurity Among Households Living in Harar and Kersa, Ethiopia (n=870).** The forest plot presents Adjusted Odds Ratios with 95% confidence intervals from an adjusted logistic regression model. Education and Occupation had 9 missing values.

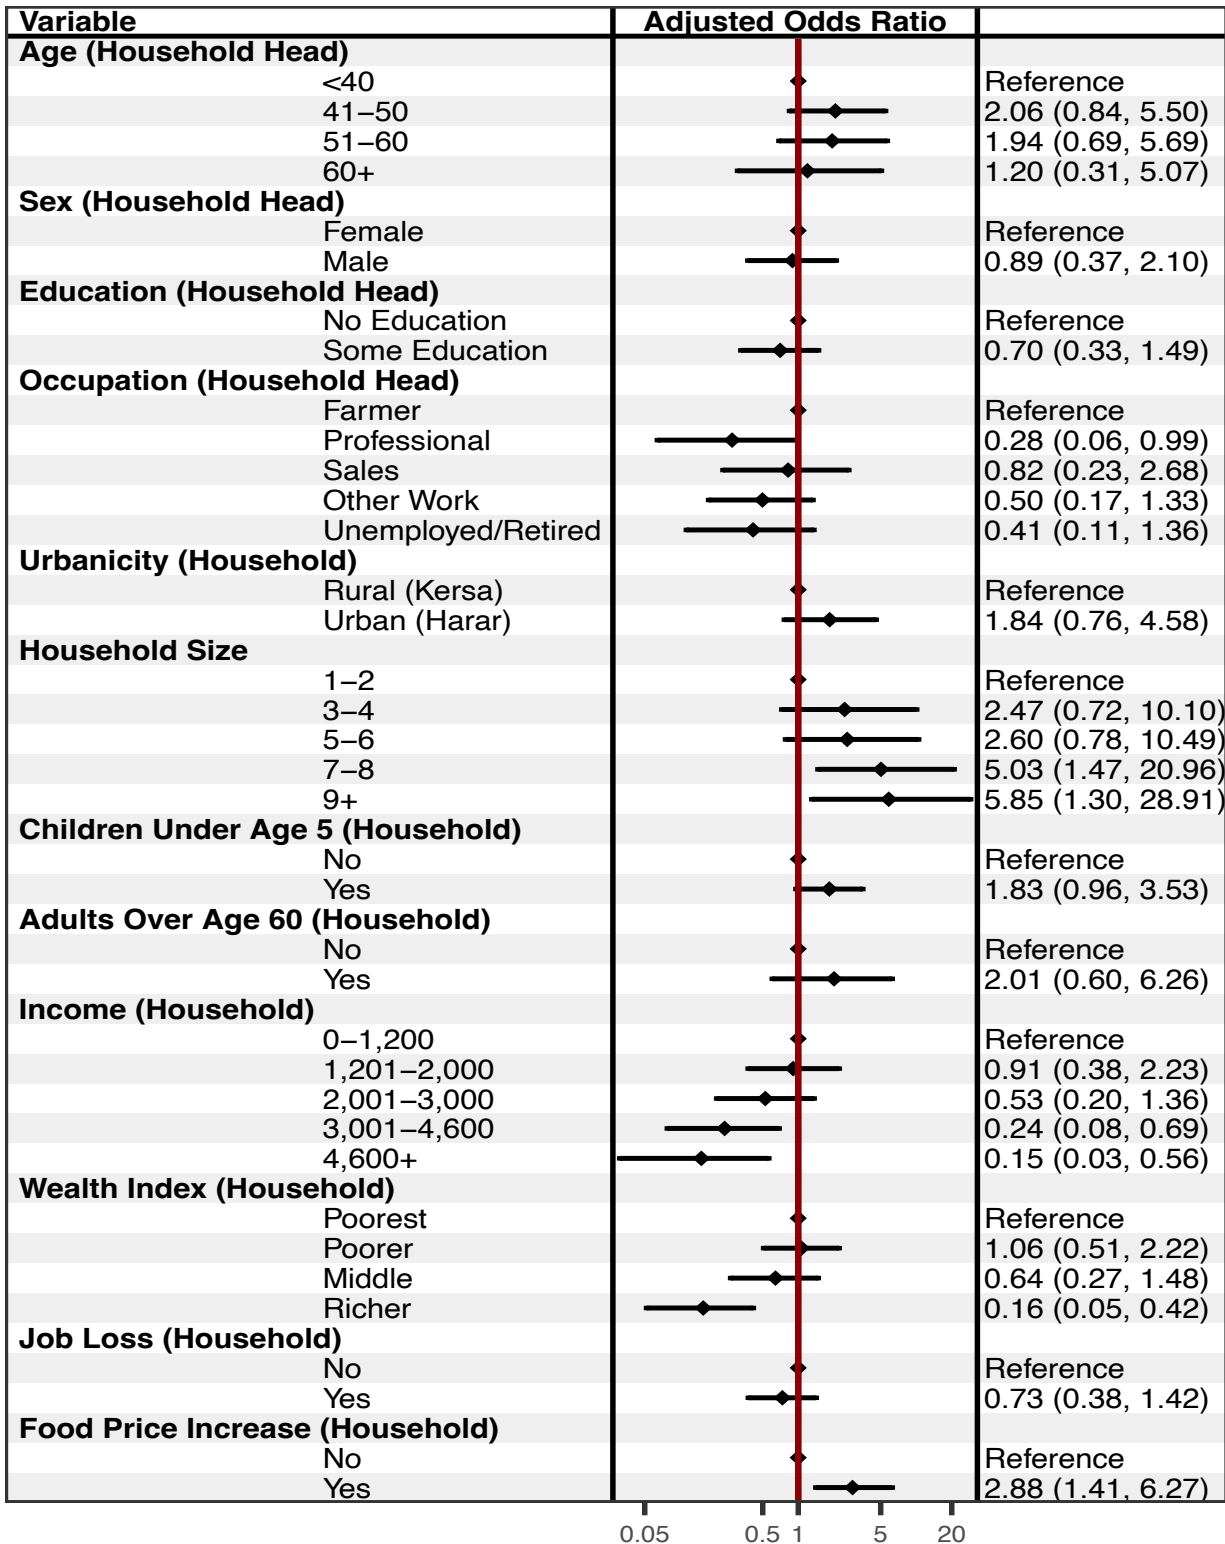

257  
258  
259  
260  
261

**Figure 3. Adjusted Associations with Food Insecurity Among Previously Food Secure Households Living in Harar and Kersa, Ethiopia (n=870).** The forest plot presents Adjusted Odds Ratios with 95% confidence intervals from an adjusted logistic regression model. Education and Occupation had 9 missing values.

## 262 **DISCUSSION**

263 In this study we examined the overall prevalence and the development of household food insecurity  
264 during the pandemic in a rural and an urban community in eastern Ethiopia. Of the 10% of households  
265 that reported having difficulty obtaining sufficient food prior to the onset of the pandemic, 94%  
266 reported continued food insecurity during the pandemic. An additional 6% of households developed  
267 food insecurity during the pandemic (these households reported having difficulty obtaining sufficient  
268 food during the pandemic period, even though they did not have difficulties before). This level of  
269 increase is somewhat lower than national level increases reported in other studies, but consistent  
270 with findings that food insecurity increases were moderate in Oromia.<sup>(38)</sup> To contextualize this increase  
271 in food insecurity, we note that at the time these data were collected there were 39,779 households  
272 living within these communities. Applying the 6% increase to the entire population would correspond  
273 to an additional 2,387 households reporting food insecurity during the pandemic. The primary reason  
274 that households reported they were unable to obtain sufficient food was that it was too expensive.  
275 Additional reasons reported by a number of households included the inability to go out and buy food  
276 due to lockdown restrictions and fear to go out and buy food during the COVID-19 pandemic.

277  
278 Overall, households were more likely to report experiencing food insecurity during the pandemic if  
279 they were already food insecure prior to COVID-19. The pandemic degenerated the food security of  
280 additional households that were vulnerable due to poverty or geospatial isolation; households were  
281 more likely to report experiencing food insecurity if they resided in an urban vs. a rural area, had a  
282 larger number of household members, had less monthly income, and were poorer compared to other  
283 households in the community. The pattern of association for both monthly income and household  
284 wealth is suggestive of a dose response to lower levels of household wealth and less monthly income.  
285 These associations are consistent with risk factors reported in studies from resource limited  
286 countries.<sup>(6, 11-13)</sup> Shocks during the pandemic associated with increased risk of food insecurity  
287 included increases in food prices and job loss; however, only increases in food prices were  
288 associated with households reporting that they were unable to obtain sufficient food after adjusting  
289 for pre-pandemic food insecurity.<sup>(6)</sup> Interventions should anticipate that households experiencing  
290 these shocks are at risk of food insecurity. Within the scope of the social vulnerability framework that  
291 we employed, we found both household level characteristics as well as community level  
292 characteristic associated with food insecurity; however, we found minimum between community  
293 variation for the associations between household level characteristics and food insecurity, the  
294 exception to these results is that the negative association between job loss and food insecurity was  
295 amplified in urban areas.

296 One limitation of this study, common to studies using HDSS data, is that the findings reported here  
297 are not generalizable outside of the communities under study.<sup>(14)</sup> As an observational study, other  
298 limitations include potential recall bias due to the extended length of time considered in the study or  
299 unmeasured variable bias; for example, having data on household participation in Ethiopia's  
300 Productive Safety Net Program (PSNP) may have helped contextualize our results, particularly the  
301 relatively lower increase in food insecurity reported by households as other studies with access to  
302 this information have noted that increases in food insecurity during the pandemic were more  
303 moderate (less than 3%) for PSNP recipients.<sup>(38)</sup>

304  
305 An additional limitation is that, given the broader goal of understanding how households'  
306 circumstances changed during the pandemic, our measure of food insecurity is less comprehensive  
307 and does not adopt standard indices of food insecurity,<sup>(47)</sup> such as a household dietary diversity  
308 score.<sup>(48)</sup> Implementing a more comprehensive measure may have improved our ability to identify  
309 households that became food insecure during the pandemic in addition to the 6% that we have  
310 reported on in this study. As a cross-sectional study, we cannot draw causal inferences. Given  
311 findings from other studies that suggest hardships associated with COVID-19 lockdowns are  
312 temporary,<sup>(7)</sup> scholars should collect and analyze longitudinal data to evaluate changes in food  
313 insecurity over time. In the context of demographic surveillance systems, follow-up data collection  
314 using the same survey instrument is easy to attach to subsequent rounds of data collection already  
315 being fielded. A concern common to studies involving complex humanitarian crises is that we are  
316 unable to distinguish between the effects of the pandemic and possible impacts of the armed conflict  
317 in the northern regions of Ethiopia that was temporarily contiguous with the pandemic.<sup>(49)</sup> However,  
318 the political tension and civil conflict in Ethiopia have occurred primarily in the northernmost region  
319 of Tigray, which is more than 400 km from the HDSS.

320  
321 By identifying factors associated with households' inability to obtain sufficient food during the  
322 pandemic period, our findings have policy implications. Established food assistance programs are  
323 critical to support, even bolster, during pandemic periods as households previously identified as food  
324 insecure will continue to require assistance. However, our findings suggest that after taking other  
325 characteristics into consideration, households in urban areas were at higher risk for food insecurity.  
326 These findings point to the need for flexibility in applying food assistance programs that may have  
327 hitherto focused on assisting rural areas; intervention policies should consider the expansion of these  
328 programs to more urban areas in the context of pandemics that cause major shocks to food supply  
329 chains and other economic disruptions. Households in urban areas are particularly vulnerable to food

330 insecurity when economic shocks result in loss of employment for household members. Given these  
331 findings, policies and practices that aim to mitigate the negative consequences of outbreaks should  
332 consider supplemental economic assistance to provide aid to households hit by broader economic  
333 shocks. These steps could mitigate the impact of lockdowns on more vulnerable households.

334

335

336

337 **REFERENCES**

- 338 1. Wang H, Paulson KR, Pease SA *et al.* (2022) Estimating excess mortality due to the  
339 COVID-19 pandemic: a systematic analysis of COVID-19-related mortality, 2020–21. *The*  
340 *Lancet*.
- 341 2. Baldwin RE & Weder B (2020) *Mitigating the COVID Economic Crisis: Act Fast and Do*  
342 *Whatever It Takes*: CEPR press.
- 343 3. Picchioni F, Goulao LF Roberfroid D (2021) The Impact of COVID-19 on Diet Quality,  
344 Food Security and Nutrition in Low and Middle Income Countries: A Systematic Review  
345 of the Evidence. *Clinical Nutrition*.
- 346 4. Osendarp S, Akuoku JK, Black RE *et al.* (2021) The COVID-19 Crisis Will Exacerbate  
347 Maternal and Child Undernutrition and Child Mortality in Low-and Middle-Income  
348 Countries. *Nature Food* 2, 476-484.
- 349 5. Akseer N, Kandru G, Keats EC *et al.* (2020) COVID-19 Pandemic and Mitigation  
350 Strategies: Implications for Maternal and Child Health and Nutrition. *The American*  
351 *Journal of Clinical Nutrition* 112, 251-256.
- 352 6. Onyango EO, Crush J Owuor S (2021) Preparing for COVID-19: Household Food  
353 Insecurity and Vulnerability to Shocks in Nairobi, Kenya. *PLoS ONE* 16, e0259139.
- 354 7. Hirvonen K, de Brauw A Abate GT (2021) Food Consumption and Food Security During  
355 the COVID-19 Pandemic in Addis Ababa. *American Journal of Agricultural Economics*  
356 103, 772-789.
- 357 8. Ayanlade A & Radeny M (2020) COVID-19 and Food Security in Sub-Saharan Africa:  
358 implications of Lockdown during Agricultural Planting Seasons. *npj Science of Food* 4, 1-  
359 6.
- 360 9. Hirvonen K, Abate GT de Brauw A (2020) Survey Suggests Rising Risk of Food and  
361 Nutrition Insecurity in Addis Ababa, Ethiopia, as COVID-19 Restrictions Continue. *IFPRI*  
362 *book chapters*, 46-49.
- 363 10. Chitiga M, Henseler M, Mabugu RE *et al.* (2021) How COVID-19 pandemic worsens the  
364 economic situation of women in South Africa. *The European Journal of Development*  
365 *Research*, 1-18.
- 366 11. Fikire AH & Zegeye MB (2022) Determinants of Rural Household Food Security Status  
367 in North Shewa Zone, Amhara Region, Ethiopia. *The Scientific World Journal* 2022.
- 368 12. Manfrinato CV, Marino A, Condé VF *et al.* (2021) High prevalence of food insecurity, the  
369 adverse impact of COVID-19 in Brazilian favela. *Public health nutrition* 24, 1210-1215.
- 370 13. Banna M, Al H, Sayeed A *et al.* (2022) Factors associated with household food insecurity  
371 and dietary diversity among day laborers amid the COVID-19 pandemic in Bangladesh.  
372 *BMC nutrition* 8, 1-11.
- 373 14. Clark S, Wakefield J, McCormick T *et al.* (2018) Hyak Mortality Monitoring System:  
374 Innovative Sampling and Estimation Methods—Proof of Concept by Simulation. *Global*  
375 *Health, Epidemiology and Genomics* 3.
- 376 15. Cutter SL, Boruff BJ Shirley WL (2012) Social vulnerability to environmental hazards. In  
377 *Hazards vulnerability and environmental justice*, pp. 143-160: Routledge.
- 378 16. Cutter SL, Barnes L, Berry M *et al.* (2008) A place-based model for understanding  
379 community resilience to natural disasters. *Global environmental change* 18, 598-606.
- 380 17. Summit W (1996) Rome declaration on world food security and world food summit. *Plan*  
381 *of action Roma*, FAO 43.



- 382 18. Elavarasan RM & Pugazhendhi R (2020) Restructured Society and Environment: A  
383 Review on Potential Technological Strategies to Control the COVID-19 Pandemic. *Science*  
384 *of The Total Environment* 725, 138858.
- 385 19. Robertson T, Carter ED, Chou VB *et al.* (2020) Early Estimates of the Indirect Effects of  
386 the COVID-19 Pandemic on Maternal and Child Mortality in Low-Income and Middle-  
387 Income Countries: A Modeling Study. *The Lancet Global Health* 8, e901-e908.
- 388 20. Dowd JB, Andriano L, Brazel DM *et al.* (2020) Demographic Science Aids in  
389 Understanding the Spread and Fatality Rates of COVID-19. *Proceedings of the National*  
390 *Academy of Sciences* 117, 9696-9698.
- 391 21. Onder G, Rezza G, Brusaferro S (2020) Case-Fatality Rate and Characteristics of Patients  
392 Dying in Relation to COVID-19 in Italy. *Jama* 323, 1775-1776.
- 393 22. Ruan Q, Yang K, Wang W *et al.* (2020) Clinical Predictors of Mortality Due to COVID-  
394 19 Based on an Analysis of Data of 150 Patients From Wuhan, China. *Intensive care*  
395 *medicine* 46, 846-848.
- 396 23. Goshu D, Ferede T, Diriba G *et al.* (2020) *Economic and Welfare Effects of COVID-19*  
397 *and Responses in Ethiopia: Initial Insights*. Ethiopian Economic Policy Research Institute.
- 398 24. Shigute Z, Mebratie AD, Alemu G *et al.* (2020) Containing the Spread of COVID-19 in  
399 Ethiopia. *Journal of Global Health* 10.
- 400 25. Baye K (2020) *COVID-19 Prevention Measures in Ethiopia: Current Realities and*  
401 *Prospects*. vol. 141: International Food Policy Research Institute.
- 402 26. Spielman SE, Tuccillo J, Folch DC *et al.* (2020) Evaluating Social Vulnerability Indicators:  
403 Criteria and Their Application to the Social Vulnerability Index. *Natural Hazards* 100,  
404 417-436.
- 405 27. Muir JA, Cope MR, Angeningsih LR *et al.* (2019) Migration and Mental Health in the  
406 Aftermath of Disaster: Evidence From MT. Merapi, Indonesia. *International journal of*  
407 *environmental research and public health* 16, 2726.
- 408 28. Muir JA, Cope MR, Angeningsih LR *et al.* (2020) To Move Home or Move On?  
409 Investigating the Impact of Recovery Aid on Migration Status as a Potential Tool for  
410 Disaster Risk Reduction in the Aftermath of Volcanic Eruptions in Merapi, Indonesia.  
411 *International Journal of Disaster Risk Reduction* 46, 101478.
- 412 29. Perry RW (2007) What is a Disaster? In *Handbook of Disaster Research*, pp. 1-15:  
413 Springer.
- 414 30. Flanagan BE, Gregory EW, Hallisey EJ *et al.* (2011) A Social Vulnerability Index for  
415 Disaster Management. *Journal of Homeland Security and Emergency Management* 8.
- 416 31. Muir JA (2018) Another mHealth? Examining Motorcycles as a Distance Demolishing  
417 Determinant of Health Care Access in South and Southeast Asia. *Journal of Transport &*  
418 *Health* 11, 153-166.
- 419 32. Sanders SR, Muir JA, Brown RB (2018) Overcoming Geographic Penalties of Inequality:  
420 The Effects of Distance-Demolishing Technologies on Household Well-Being in Vietnam.  
421 *Asian Journal of Social Science* 46, 260-280.
- 422 33. Muir JA, Deresa M, Madewell ZJ *et al.* (2023) Household Hardships during the COVID-  
423 19 Pandemic: Examining Household Vulnerability and Responses to Pandemic Related  
424 Shocks in Eastern Ethiopia. *medRxiv*, 2023.2002. 2001.23285322.
- 425 34. Bedeke SB (2012) Food insecurity and coping strategies: a perspective from Kersa  
426 district, East Hararghe Ethiopia. *Food Science and Quality Management* 5, 19-27.

- 427 35. Gebru M, Remans R, Brouwer ID *et al.* (2018) Food systems for healthier diets in Ethiopia:  
428 Toward a research agenda. *IFPRI Discussion Paper*.
- 429 36. Haile D, Seyoum A Azmeraw A (2022) Food and nutrition security impacts of resilience  
430 capacity: Evidence from rural Ethiopia. *Journal of Agriculture and Food Research* 8,  
431 100305.
- 432 37. Clay DC, Molla D Habtewold D (1999) Food aid targeting in Ethiopia: A study of who  
433 needs it and who gets it. *Food policy* 24, 391-409.
- 434 38. Abay K, Berhane G, Hodidinott J *et al.* (2020) COVID-19 and food security in Ethiopia:  
435 do social protection programs protect?
- 436 39. Juntunen L (2004) Addressing Social Vulnerability to Hazards, University of Oregon  
437 Eugene.
- 438 40. Assefa N, Oljira L, Baraki N *et al.* (2016) HDSS profile: the Kersa Health and  
439 Demographic Surveillance System. *International Journal of Epidemiology* 45, 94-101.
- 440 41. Cunningham SA, Shaikh NI, Nhacolo A *et al.* (2019) Health and Demographic  
441 Surveillance Systems within the Child Health and Mortality Prevention Surveillance  
442 Network. *Clinical Infectious Diseases* 69, S274-S279.
- 443 42. Nhacolo A, Madewell ZJ, Muir JA *et al.* (2023) Knowledge of COVID-19 Symptoms,  
444 Transmission, and Prevention: Evidence from Health and Demographic Surveillance in  
445 Southern Mozambique. *medRxiv*, 2023.2003.2031.23288026.
- 446 43. Cunningham SA & Muir JA (2023) Data Cleaning. In *The Cambridge Handbook of*  
447 *Research Methods and Statistics for the Social and Behavioral Sciences: Volume 1:*  
448 *Building a Program of Research (Cambridge Handbooks in Psychology, pp 443-467)*, vol.  
449 1 [AL Nichols and JE Edlund, editors]. Cambridge: Cambridge University Press.
- 450 44. R Core Team (2022) R: A Language and Environment for Statistical Computing. Vienna,  
451 Austria: R Foundation for Statistical Computing.
- 452 45. Yeh J & D'Amico F (2004) Forest plots: data summaries at a glance. *Journal of Family*  
453 *Practice* 53, 1007-1008.
- 454 46. Lewis SC, Keerie C Assi V Forest Plot. In *Wiley StatsRef: Statistics Reference Online*, pp.  
455 1-6.
- 456 47. Maxwell D, Vaitla B Coates J (2014) How do indicators of household food insecurity  
457 measure up? An empirical comparison from Ethiopia. *Food policy* 47, 107-116.
- 458 48. Swindale A & Bilinsky P (2006) Household dietary diversity score (HDDS) for  
459 measurement of household food access: indicator guide. *Washington, DC: Food and*  
460 *Nutrition Technical Assistance Project, Academy for Educational Development*.
- 461 49. Muir JA (2021) *Societal Shocks as Social Determinants of Health*: The Ohio State  
462 University.
- 463 50. Rutstein SO (2015) Steps to Constructing the New DHS Wealth Index. *Rockville, MD: ICF*  
464 *International*.
- 465 51. Hjelm L, Mathiassen A, Miller D *et al.* (2017) Creation of a wealth index. *United Nations*  
466 *World Food Programme*.
- 467 52. Fry K, Firestone R Chakraborty NM (2014) Measuring Equity With Nationally  
468 Representative Wealth Quintiles. *Washington DC*.

469

## 470 SUPPLEMENT A. WEALTH INDEX GENERATION

471 A wealth index was generated based on a collection of assets and construction materials for the main  
472 dwelling of a given household. To generate the index, we followed recommendations from the DHS  
473 and the World Food Programme (WFP) that summarize steps for calculating an asset based wealth  
474 index,<sup>(50, 51)</sup> including coding instructions for Stata,<sup>(52)</sup> and an adaptation of this coding process  
475 implemented in R.<sup>(31, 49)</sup> Using these documents to guide us, we generated our wealth index by  
476 identifying a list of household assets for inclusion in our index computation, recoded all household  
477 assets into dichotomous variables; recoded dwelling materials into improved vs. non-improved  
478 dichotomous variables; divided our sample into rural and urban subsamples and assessed level of  
479 representation of a given variable within the rural and urban subsamples (per WFP recommendations,  
480 a given variable was included in further calculations if percent ownership ranged between 5 and 95  
481 percent); employed principal components analysis with varimax rotation to calculate component  
482 scores for those households living in either rural or urban areas, which explained 45% of the variation  
483 in both subsamples; extracted and combined the PCA scores of the first component from the urban  
484 and rural subsamples; and finally organized the scores into wealth quintiles to generate a composite  
485 asset index. The resulting wealth quintiles are presented in Figure (4). The distribution of assets  
486 owned by households as well as the materials used for constructing a household's residence are  
487 presented as percentages in Figure (5).

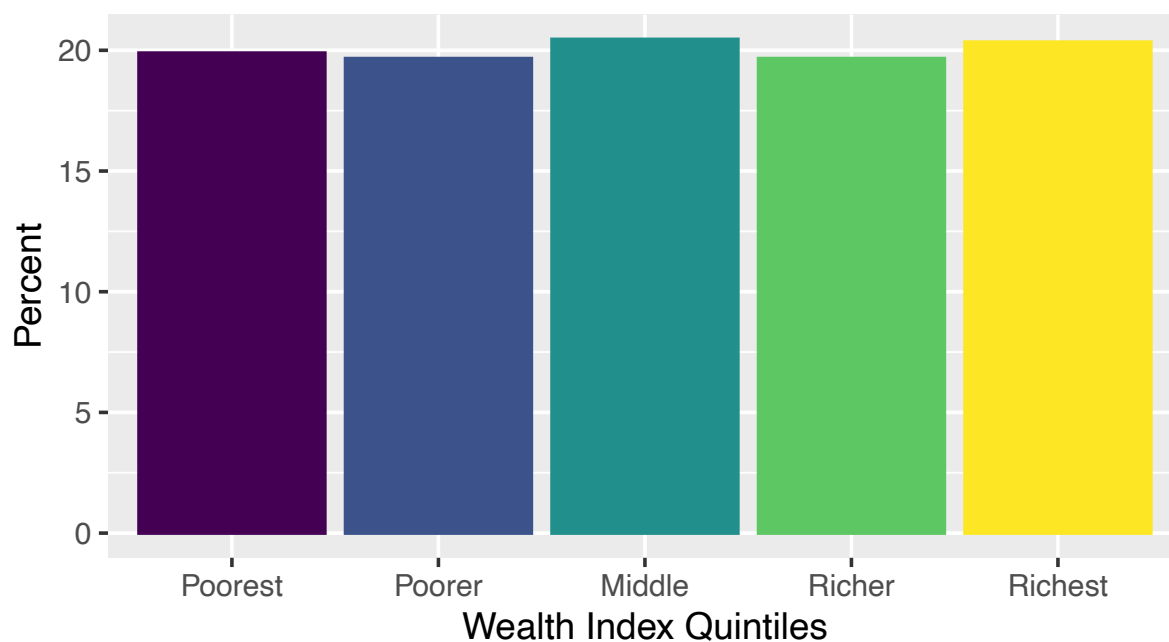

488

489

**Figure 4.** Household Wealth Index Distribution

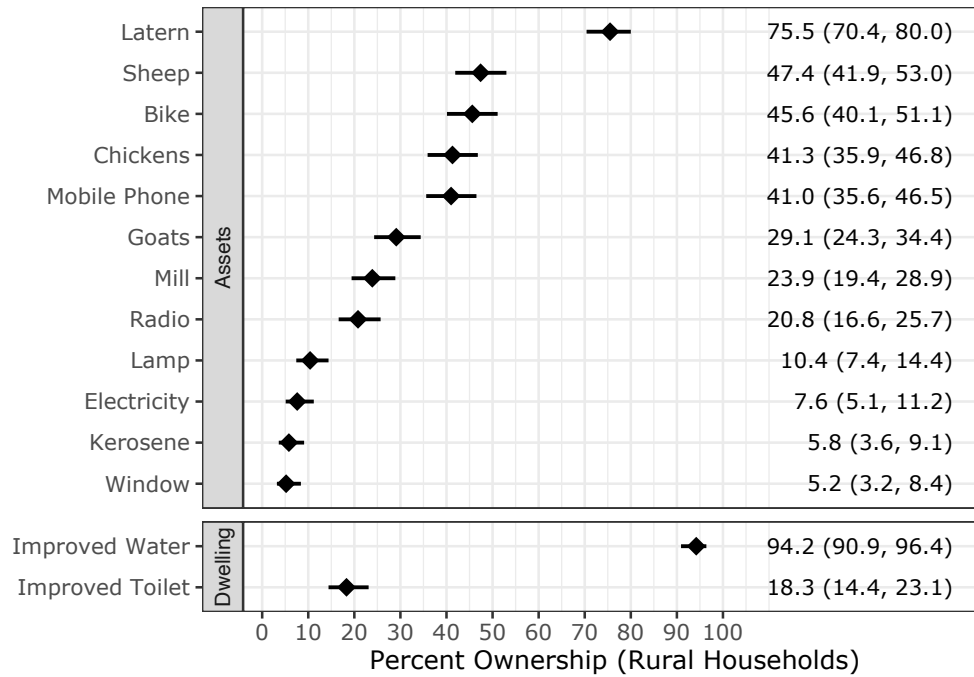

490

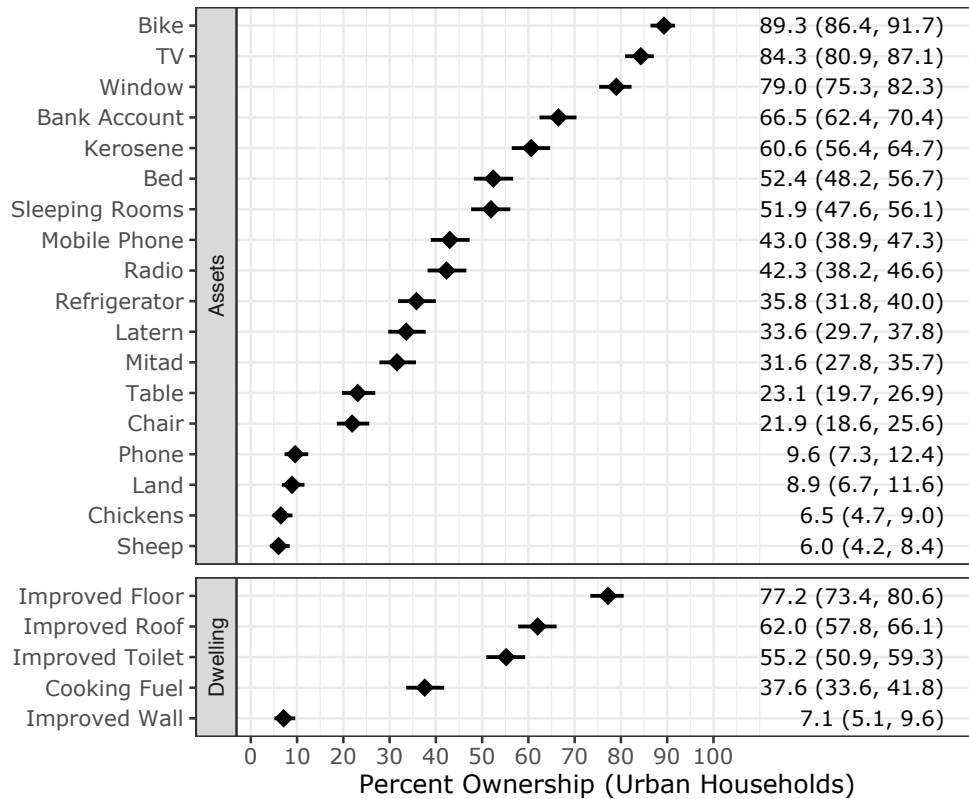

491

492

493

**Figure 5.** Households Asset Ownership and Dwelling Construction Materials included in Wealth Index
